# Supplementary material
Source: publisher site journal article supplement (https://www.dovepress.com/article/supplementary_file/598348/Supplementary%20Material.xlsx)
Supplement: Supplementary file 1 [file Supplementary%20Material.xlsx]

## Sheet: Supplementary Material
Supplementary Table 1 Pearson correlation coefficient
	Age	Gender	HBV infection	Cirrhosis	Child_Pugh	BCLC stage	TBS	PNI	SII	LMR	PLR	NLR	AFP	TB	ALB	ALT	AST	Extrahepatic metastasis	Vascular invasion
Age	1
Gender	0.026	1
HBV infection	-0.184	0.153	1
Cirrhosis	-0.054	0.037	0.197*	1
Child_Pugh	-0.125	0.031	0.031	0.012	1
BCLC stage	-0.329**	0.059	-0.048	-0.017	0.188	1
TBS	-0.151	0.171	0.06	-0.002	0.04	0.229*	1
PNI	-0.018	0.033	-0.019	0.214**	0.308	0.088	0.214*	1
SII	-0.253**	0.083	-0.076	-0.005	0.145	0.301**	0.278**	0.16	1
LMR	0.189*	-0.106	0.005	-0.078	-0.224	-0.234*	-0.235	-0.352	-0.446**	1
PLR	-0.194*	0.029	-0.113	-0.071	0.119	0.103	0.354	0.187	0.379*	-0.314	1
NLR	-0.14	0.009	-0.05	0	0.366	0.13	0.358	0.328	0.415**	-0.443**	0.49**	1
AFP	-0.251**	0.016	0.174	0.037	0.155	0.197*	0.112	0.268	0.13	-0.153**	0.051	0.114	1
TB	-0.098	-0.024	0.263**	0.165	0.134	-0.039	-0.033	0.266	-0.006	-0.24	0.123	0.093	0.247**	1
ALB	0	-0.06	0.106	-0.074	-0.305	-0.152	-0.084	-0.628	-0.087	0.235	-0.097	-0.189*	-0.188*	-0.174	1
ALT	-0.089	0.086	0.243**	0.069	0.057	-0.095**	0.176	0.107	-0.057	-0.051	-0.008	0.049	0.052	0.109	0.051	1
AST	-0.188*	0.146	0.269**	-0.014	0.176	0.188	0.316	0.365	0.145	-0.302**	0.133	0.115	0.376	0.231*	-0.228	0.407**	1
Extrahepatic metastasis	-0.23*	-0.085	0.038	-0.113	0.043	0.453**	0.125	0.178	0.151	-0.139	0.208*	0.118	0.17	0.044	-0.125	-0.031	0.171	1
Vascular invasion	-0.232*	0.086	-0.019	0.106	0.182	0.782**	0.138	0.107	0.16	-0.239	0.041	0.049	0.16	0.07	-0.214*	-0.072	0.156	0.178	1
* p<0.05 ** p<0.01
Supplementary Table 2 VIF multicollinearity assessment
Variables	VIF_value		Tolerance
Age	1.32673		0.753735
Gender	1.11857		1.75374
HBV infection	1.40517		2.75374
Cirrhosis	1.21921		3.75374
Child_Pugh	1.3481		4.75374
BCLC stage	4.26716		5.75374
TBS	5.26716		6.75374
PNI	6.26716		7.75374
SII	7.26716		8.75374
LMR	8.26716		9.75374
PLR	9.26716		10.7537
NLR	10.2672		11.7537
AFP	11.2672		12.7537
TB	12.2672		13.7537
ALB	13.2672		14.7537
ALT	14.2672		15.7537
AST	15.2672		16.7537
Extrahepatic metastasis	16.2672		17.7537
Vascular invasion	17.2672		18.7537
